# Supplementary material for: Ndfip2 is a potential regulator of the iron transporter DMT1 in the liver
Source: PubMed Central journal article supplement (PMC4822147; doi:10.1038/srep24045), 2016-04-06
Supplement: srep24045-s1.pdf [file srep24045-s1.pdf]

## **Ndfip2 is a potential regulator of the iron transporter DMT1 in the liver**

Natalie J. Foot, Kelly M. Gembus, Kimberly Mackenzie and Sharad Kumar\*

Centre for Cancer Biology, University of South Australia, c/o SA Pathology, PO Box 14,  
Rundle Mall, Adelaide, SA 5001, Australia

\* Corresponding author: [sharad.kumar@unisa.edu.au](mailto:sharad.kumar@unisa.edu.au)

## Supplementary Material

**Supplementary Table 1. Primers used for genotyping and qPCR.** All primers were designed to amplify the mouse sequences.

| Gene                                | Primer sequence (5'-3')                               |
|-------------------------------------|-------------------------------------------------------|
| <i>Ndfip2</i> genotyping primer "a" | CAGCATTGATGCATGGTCAGC                                 |
| <i>Ndfip2</i> genotyping primer "b" | GATTACAAATGCTCCTGCAGG                                 |
| <i>Ndfip2</i> genotyping primer "c" | CAACGGGTTCTTCTGTAGTCC                                 |
| <i>TBP</i>                          | F: CAAACCCAGAATTGTTCTCCTT<br>R: ATGTGGTCTTCCTGAATCCCT |
| <i>Fpn</i>                          | F: TAAAGTGGCCCAGACGTCAC<br>R: AGCAGACAGTAAGGACCCATC   |
| <i>HAMP</i>                         | F: ACATTGCGATACCAATGCAGAA<br>R: GCAACAGATACCACACTGGGA |
